# Supplementary material for: Synthesis of petal-like δ-MnO2 and its catalytic ozonation performance
Source: Royal Society of Chemistry journal article supplement (doi:10.1039/c8nj00240a), 2018-01-01
Supplement: c8nj00240a1.pdf [file c8nj00240a1.pdf]

## Supplementary Material

### Synthesis of petal-like $\delta$ -MnO<sub>2</sub> and its catalytic ozonation performance

Kai Luo <sup>a, b</sup>, Shi-Xi Zhao <sup>a\*</sup>, Yi-Feng Wang <sup>a, b</sup>, Shu-Jin Zhao <sup>a, c</sup>, Xi-Hui Zhang<sup>a</sup>

<sup>a</sup> Graduate School at Shenzhen, Tsinghua University, Shenzhen, 518055, China

<sup>b</sup> School of Materials Science and Engineering, Tsinghua University, Beijing, 100084, China

<sup>c</sup> School of Materials Science and Engineering, Jiamusi University, Jiamusi, 154007, China

\* Corresponding author.

E-mail address: zhaosx@sz.tsinghua.edu.cn (S.-X. Zhao).

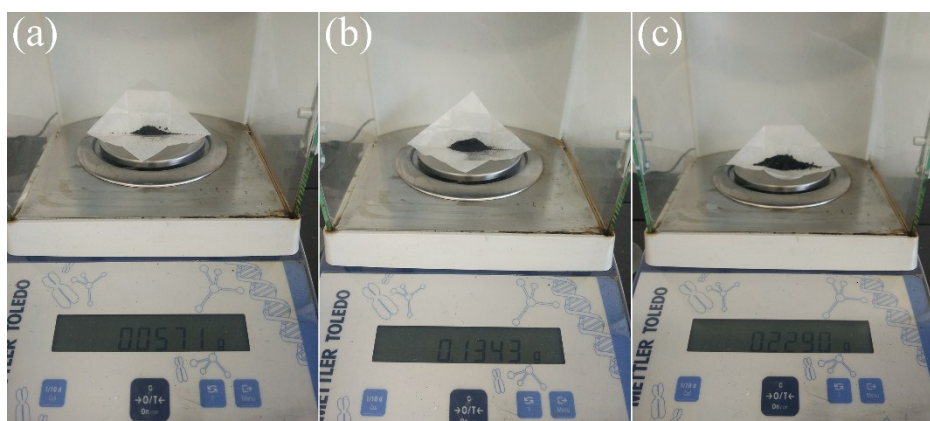

**Fig. S1** The quality of the preparation of samples: (a)  $\delta$ -MnO<sub>2</sub>-C0.1-12, (b)  $\delta$ -MnO<sub>2</sub>-C0.1-18, (c)  $\delta$ -MnO<sub>2</sub>-C0.1-24.

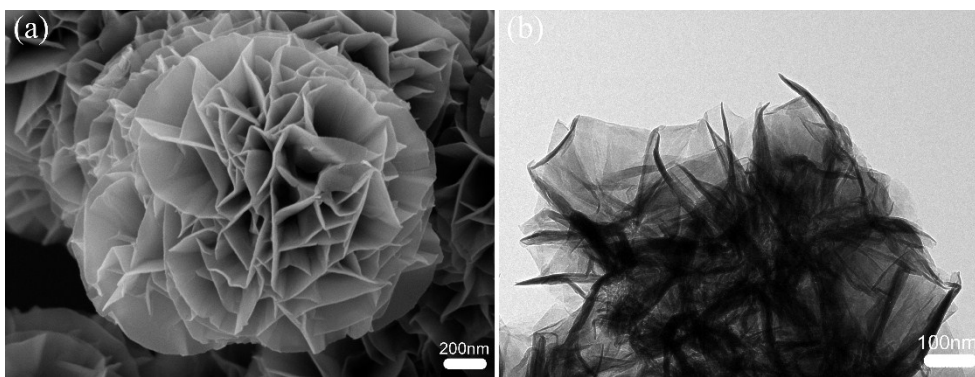

**Fig. S2** The higher magnification image of  $\delta$ -MnO<sub>2</sub>-C0.1-24: (a) SEM, (b) TEM.

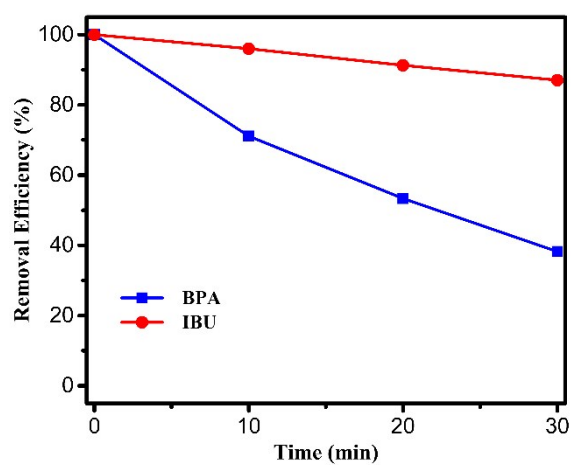

**Fig. S3** Ozonation of BPA and IBU without catalyst. Reaction conditions: [BPA]<sub>0</sub> = 10 ppm, [IBU]<sub>0</sub> = 10 ppm, ozone concentration: 4 mg/L, ozone flow rate: 0.2 L/min.

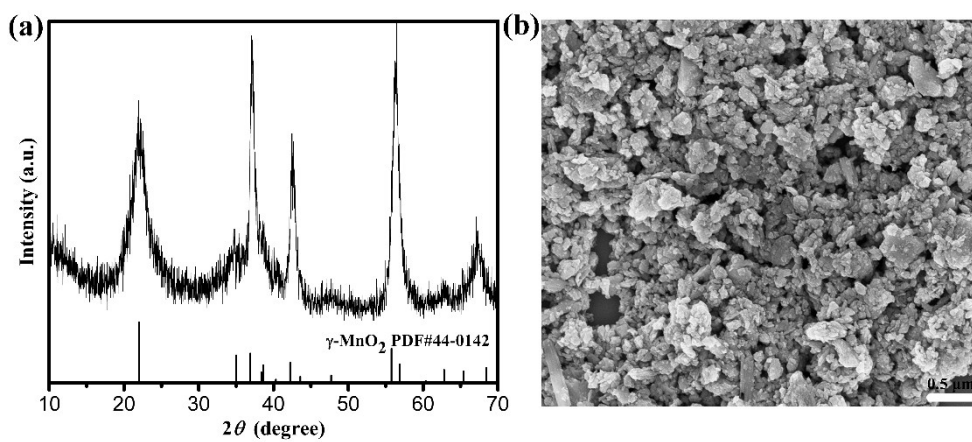

**Fig. S4** (a) XRD patterns and (b) SEM image of the commercial MnO<sub>2</sub>.
